# Supplementary material
Source: PubMed Central journal article supplement (PMC6005445)
Supplement: supp_RA118.002709_136402_1_supp_120360_p7941s.pdf [file supp_RA118.002709_136402_1_supp_120360_p7941s.pdf]

# Myc Phosphorylation in the bHLH-LZ Inhibits Binding to Max and DNA

## Supplementary Information

Macek P.

April 16, 2018

### 1 Protein constructs

Myc<sup>WT</sup> bHLH-LZ

MHHHHHHHENLYFQGSNVKRRTHNVLERQRRNELKRSFFALRDQIPELENNEKAPKVVILK  
KATAYILSVQAEEQKLISEEDLLRKRREQLKHKLEQLRNS

Max bHLH-LZ

MHHHHHHHENLYFQGSMDKRAHHNALERKRRDHKDSFHSRLRDSVPSLQGEKASRAQILDK  
ATEYIQYMRRKNHHTHQDIDDLKRQNALLEQQVRLGG

Myc S373D/T400D bHLH-LZ

MHHHHHHHENLYFQGSNVKRRTHNVLERQRRNELKR<sup>D</sup>FFALRDQIPELENNEKAPKVVILK  
KADAYILSVQAEEQKLISEEDLLRKRREQLKHKLEQLRNS

Myc S373E/T400E bHLH-LZ

MHHHHHHHENLYFQGSNVKRRTHNVLERQRRNELKR<sup>E</sup>FFALRDQIPELENNEKAPKVVILK  
KAEAYILSVQAEEQKLISEEDLLRKRREQLKHKLEQLRNS

Myc S373D bHLH-LZ

MHHHHHHHENLYFQGSNVKRRTHNVLERQRRNELKR<sup>D</sup>FFALRDQIPELENNEKAPKVVILK  
KATAYILSVQAEEQKLISEEDLLRKRREQLKHKLEQLRNS

Myc T400D bHLH-LZ

MHHHHHHHENLYFQGSNVKRRTHNVLERQRRNELKRSFFALRDQIPELENNEKAPKVVILK  
KADAYILSVQAEEQKLISEEDLLRKRREQLKHKLEQLRNS

Omomyc

MHHHHHHHENLYFQGSNVKRRTHNVLERQRRNELKRSFFALRDQIPELENNEKAPKVVILK  
KATAYILSVQAETQKLISEIDLLRKQNEQLKHKLEQLRNS

### 2 E-box DNA

5'-AGTTGACCACGTGGTCTGGG-3'

5'-CCAGACCACGTGGTCAACT-3'

### 3 Supplementary Tables and Figures

| phosphorylation site | phospho peptide seq. | exp. mass | theor. mass |
|----------------------|----------------------|-----------|-------------|
| pT358                | RRTHNVLER            | 1259.624  | 1259.647    |
| pS373                | RSFFALR              | 975.469   | 974.492     |
| pT400                | KATAYILSVQAEQK       | 1757.860  | 1757.883    |
| pY402                | KATAYILSVQAEQK       | 1757.860  | 1757.883    |
| pS405                | ATAYILSVQAEQK        | 1629.763  | 1629.788    |
| pS437                | LEQLRNS              | 928.422   | 938.445     |

Table S1: Phosphorylation sites identified using MS with corresponding peptides including the monoisotopic experimental and theoretical masses. Corresponding MSMS spectra and Mascot (Matrix Science) match are highlighted in Figures S1-S3.

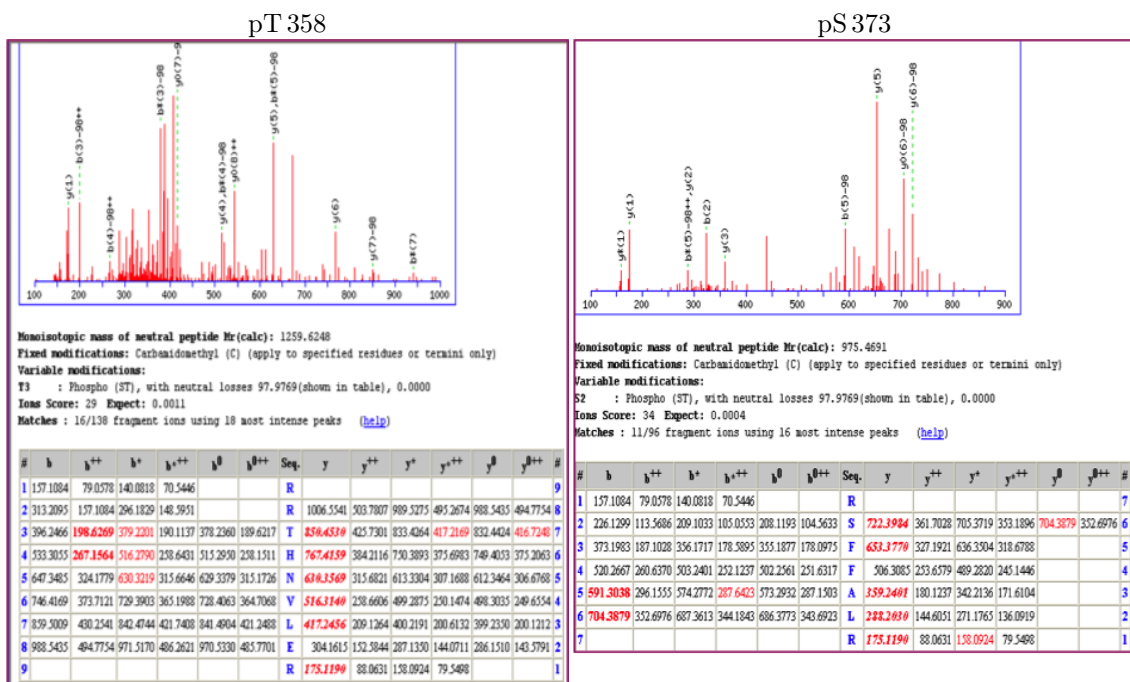

Figure S1: Output of the MSMS search results from Mascot (Matrix Science). Identified peptide sequence The table shows theoretical b and y MSMS ion masses of the corresponding peptide (center column) fragments. MS spectra and match of experimental and theoretical fragment ions for each peptide are highlighted in red. The matched ions confirm the identity of the peptides containing phosphorylated T358 and S373.

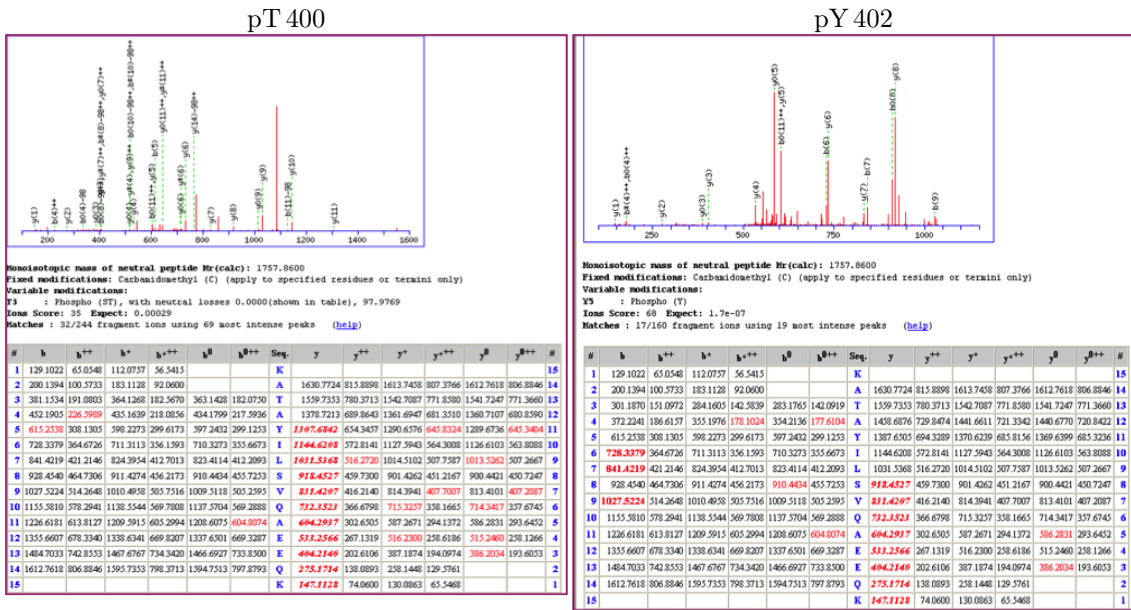

Figure S2: MSMS search results from MASCOT for T400 and Y402 phosphorylation. See Figure S1 for further details.

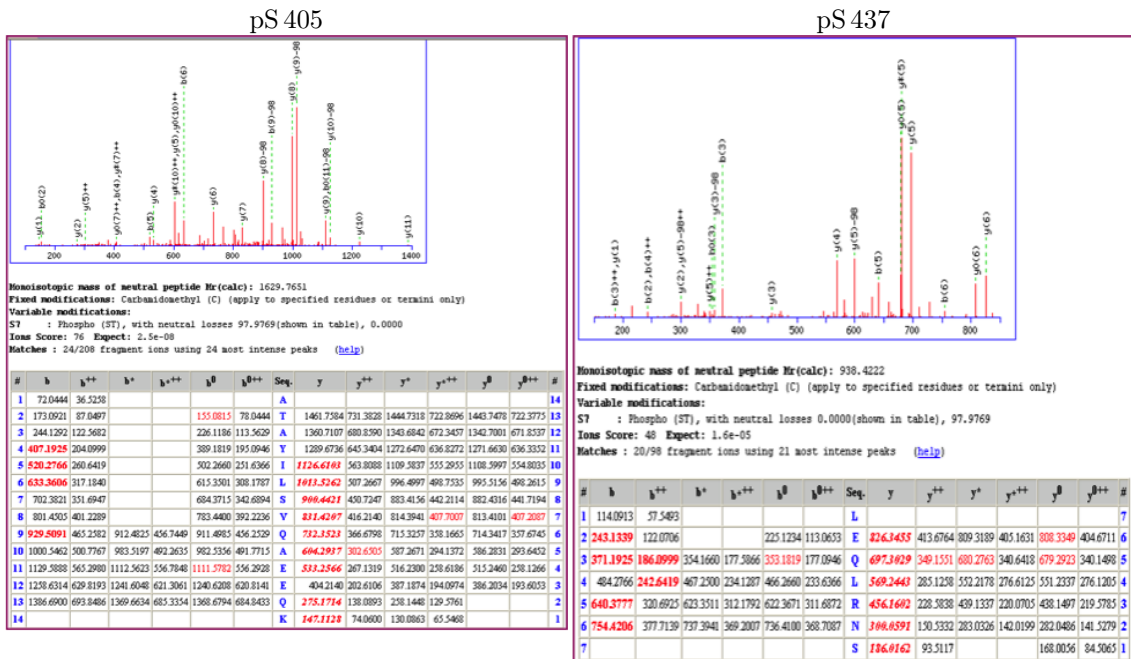

Figure S3: MSMS search results from MASCOT for S3405 and S437 phosphorylation. See Figure S1 for further details.



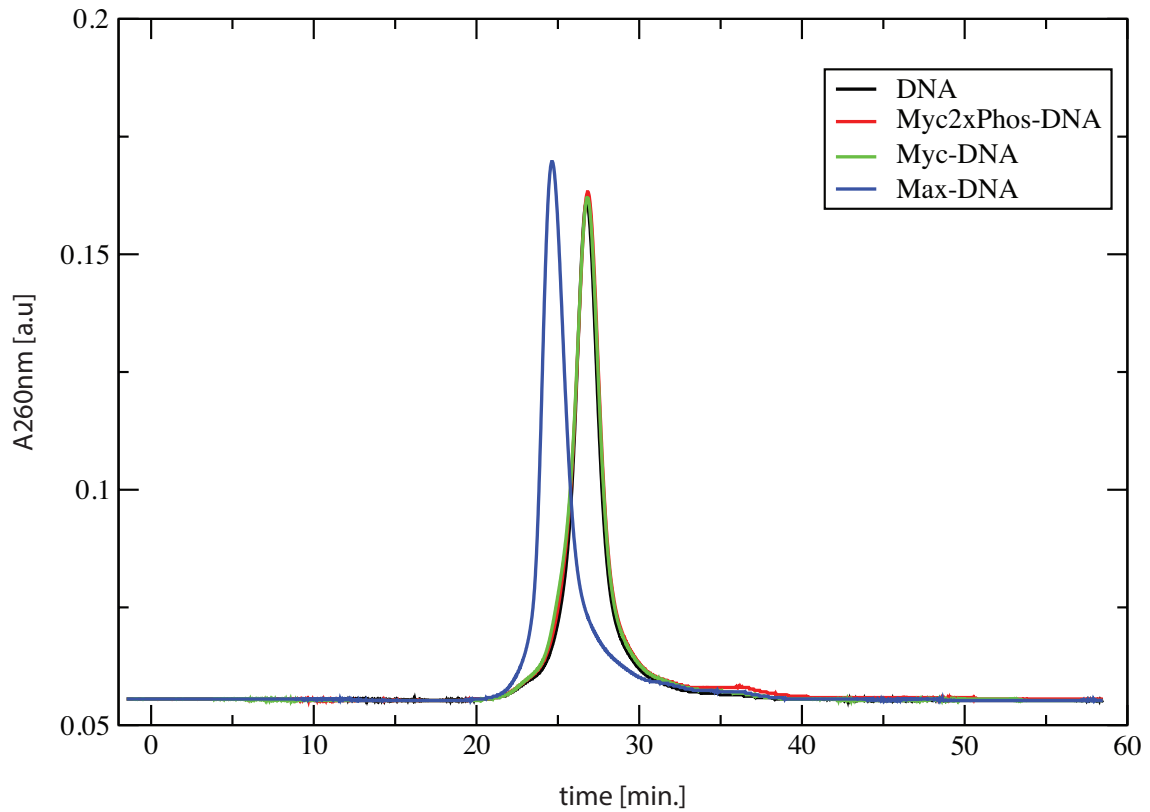

Figure S5: Gel filtration DNA shift assay of MycWT, MycWT 2xPhos, and Max. Max (blue) homodimerizes and binds to DNA, shifting the peak of DNA to a shorter elution time relative to the DNA control (black). In contrast to Max (blue), MycWT (green) and MycWT 2xPhos (red) are not able to form stable complex with DNA.

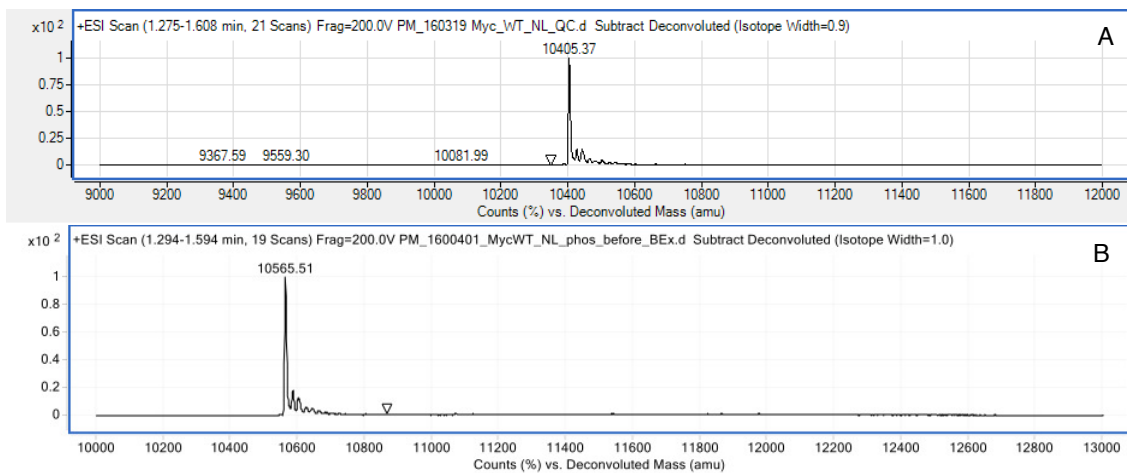

Figure S6: MS quality control of (A) Myc<sub>WT</sub> before phosphorylation and (B) Myc<sub>WT</sub>-2P after the phosphorylation by PAK2 and purification on ResS cation exchange. Difference of 160 Da indicate two additional phospho groups on Myc<sub>WT</sub>.

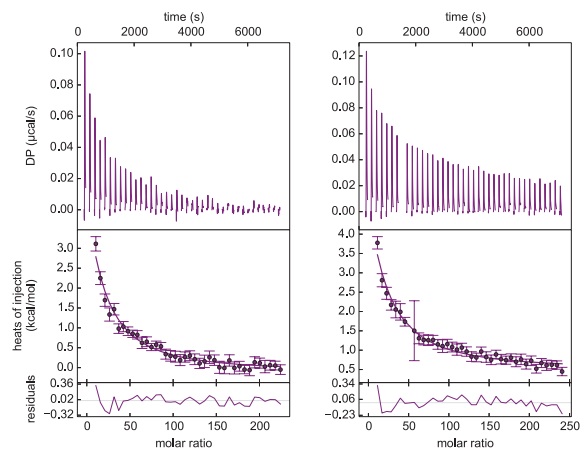

Figure S7: ITC injection heats, including fit and fit residuals for Max dissociation. Max bHLH-LZ ( $160\mu\text{M}$ ) was titrated into the buffer as described in experimental procedures.

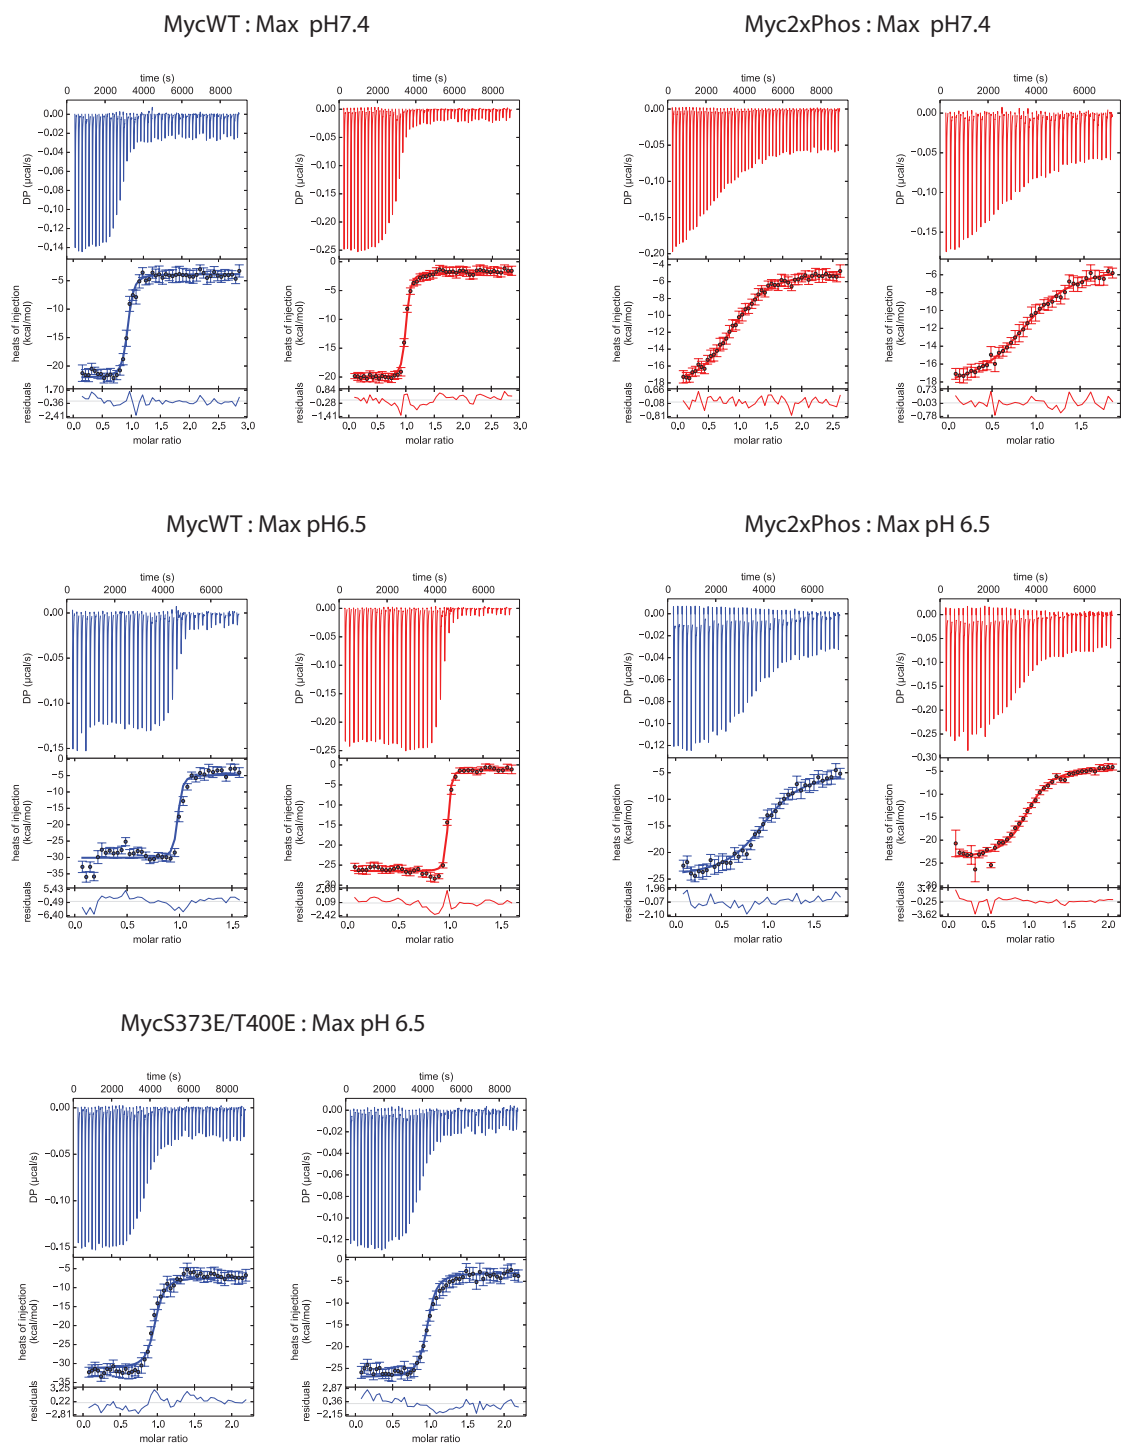

Figure S8: ITC injection heats, including fit and fit residuals for MycWT and MycWT 2xPhos at pH 7.4 and MycWT, MycWT 2xPhos, and MycS373E/T400E at pH 6.5. Data were obtained at  $2\mu\text{M}$  Max and  $20\mu\text{M}$  titrant (red) and  $4\mu\text{M}$  Max and  $40\mu\text{M}$  titrant (blue). Data at different concentrations were fitted simultaneously to obtain binding constant and thermodynamic information.

MycS373D/T400D : Max pH 6.5

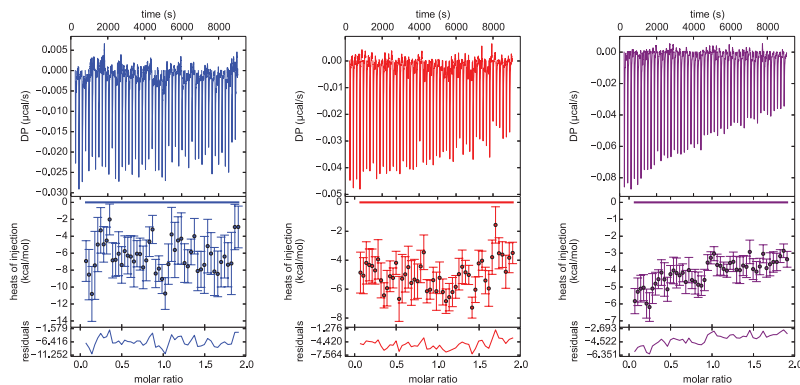

MycT400D : Max pH 6.5  
1:1 stoichiometry setup

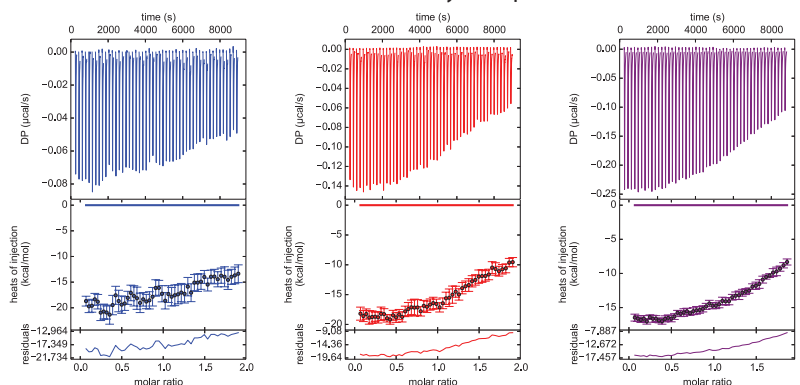

MycS373D : Max pH 6.5

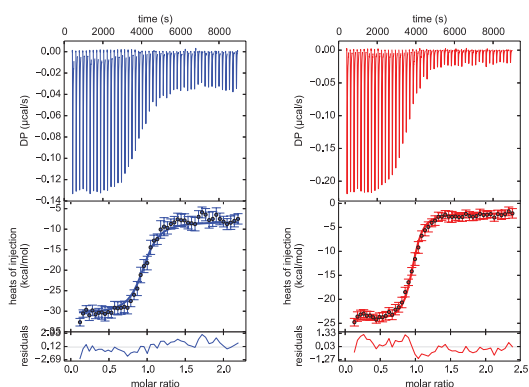

MycT400D : Max pH 6.5  
2:1 stoichiometry setup

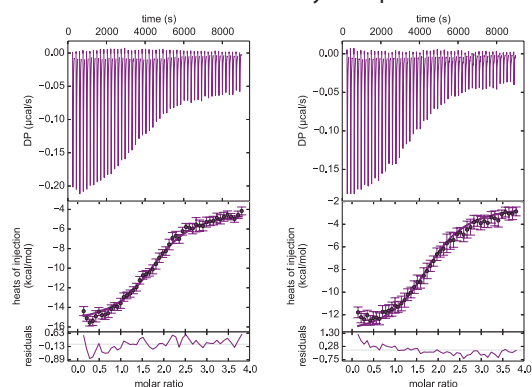

Figure S9: ITC injection heats, including fit and fit residuals for MycS373D/T400D, MycT400D and Myc373D at ITC setup for expected 1:1 stoichiometry followed by MycT400D at ITC setup for 2:1 stoichiometry. Data were obtained at  $2\mu\text{M}$  Max and  $20\mu\text{M}$  titrant (red),  $4\mu\text{M}$  Max and  $40\mu\text{M}$  titrant (blue), and  $8\mu\text{M}$  Max and  $80\mu\text{M}$  titrant (magenta). Data at different concentrations were fitted simultaneously to obtain binding constant and thermodynamic information.



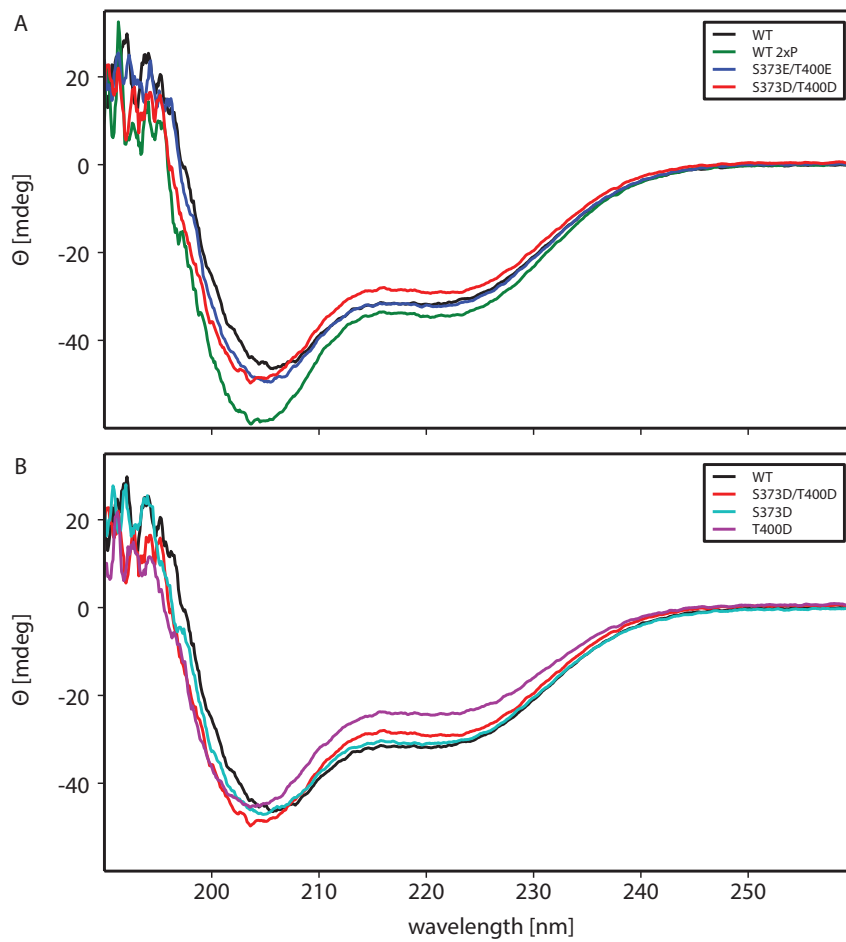

Figure S10: Raw circular dichroism spectra of MycWT (black), MycWT 2xPhos (green), Myc S373D/T400D (red), Myc S373E/T400E (blue), Myc T400D (magenta), and Myc T373D (cyan).  $\Theta$  minimum at 205nm indicate presence of a random coil mixed with  $\alpha$ -helix. The presence of  $\alpha$ -helix characterized by  $\Theta$  at 222nm.
